# Supplementary material for: Dissection of the Fgf8 regulatory landscape by in vivo CRISPR-editing reveals extensive intra- and inter-enhancer redundancy
Source: PubMed Central journal article supplement (PMC7815712; doi:10.1038/s41467-020-20714-y), 2021-01-19
Supplement: 41467_2020_20714_MOESM1_ESM.pdf [file 41467_2020_20714_MOESM1_ESM.pdf]

## Supplementary information

### Dissection of the *Fgf8* regulatory landscape by *in vivo* CRISPR-editing reveals extensive intra- and inter-enhancer redundancy

Hörnblad, A.<sup>1,2,3,4</sup>, Bastide, S.<sup>1,2,3\*,#</sup>, Langenfeld, K.<sup>1\*</sup>, Langa, F.<sup>5</sup>, Spitz, F.<sup>1,2,3,#</sup>

<sup>1</sup> Developmental Biology Unit, EMBL, Meyerhofstrasse 1, Heidelberg 69117, Germany.

<sup>2</sup> (Epi)genomics of animal Development Unit, Department of Developmental and Stem Cell Biology, Institut Pasteur, 75015 Paris, France

<sup>3</sup> CNRS, UMR3738.

<sup>4</sup> Umeå Centre for Molecular Medicine, Umeå University, 90187, Umeå, Sweden.

<sup>5</sup> Mouse Genetics Engineering, Center for Innovation & Technological Research, Institut Pasteur, 75015 Paris, France

\* These authors contributed equally

# Present address: Department of Human Genetics, The University of Chicago, Chicago IL, USA

Supplementary Figures 1-8

Supplementary Tables 1-6

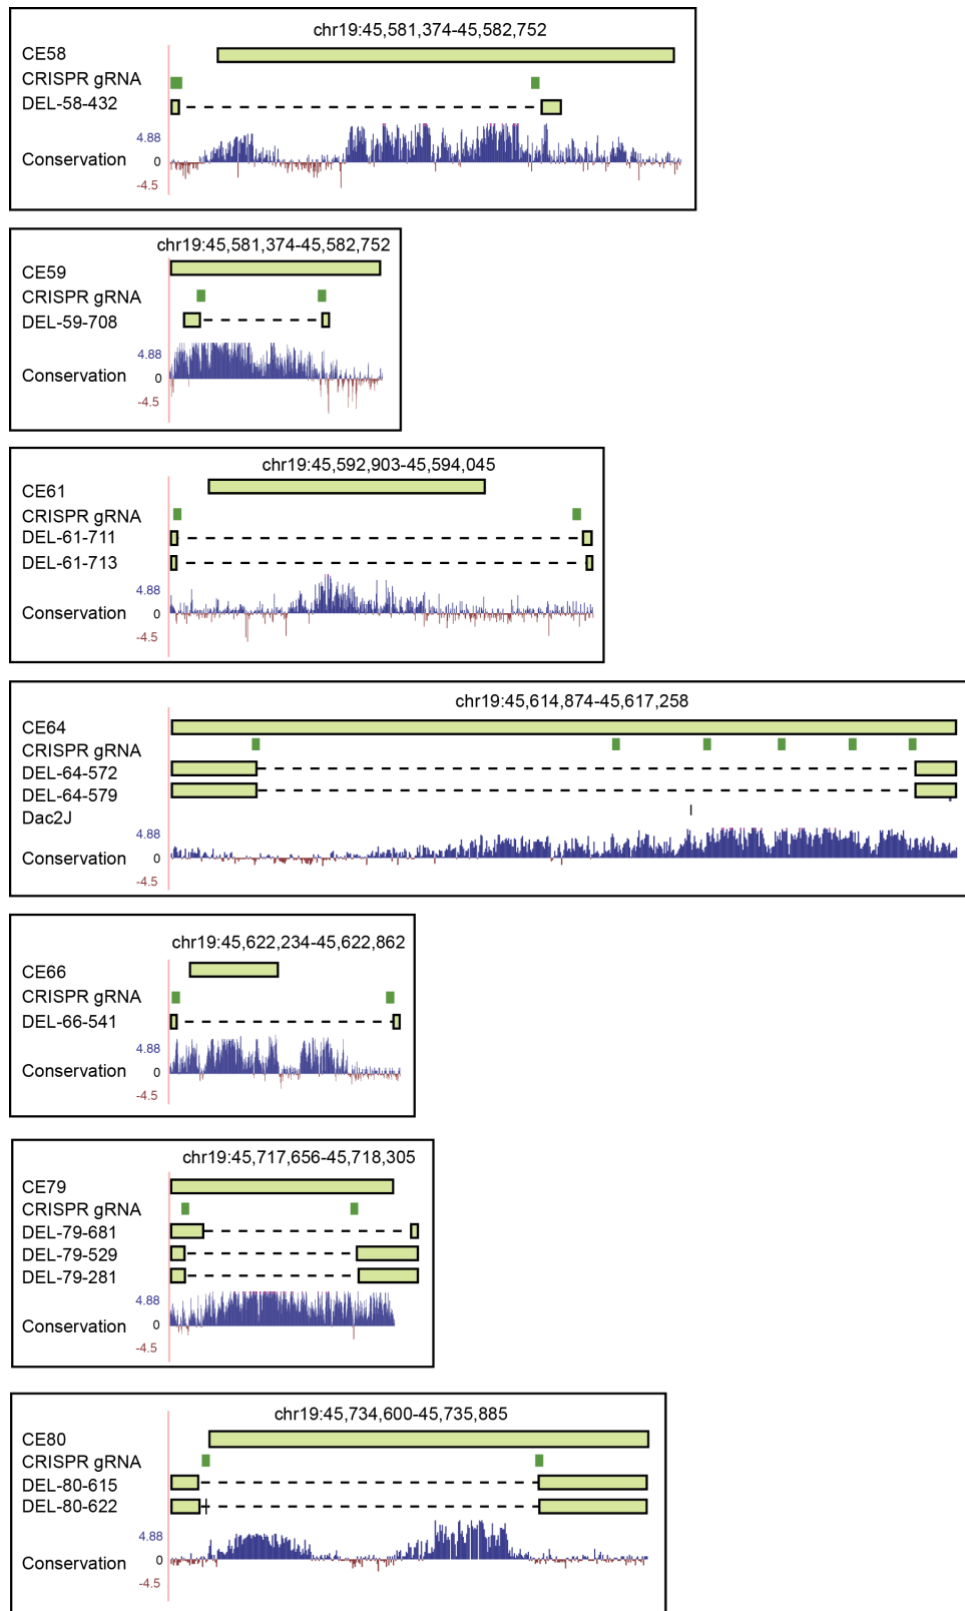

**Supplementary Figure 1. Genomic coordinates of the seven putative enhancers.** Upper row depicts mouse sequences homologous to human sequences with reported enhancer activity. Green boxes indicate CRISPR gRNAs used to create enhancer deletions. Dashed lines depict the location of the deletions for all lines used. DEL79-281 indicates the deletion of the DEL79-80 line that was generated over DEL80-622.

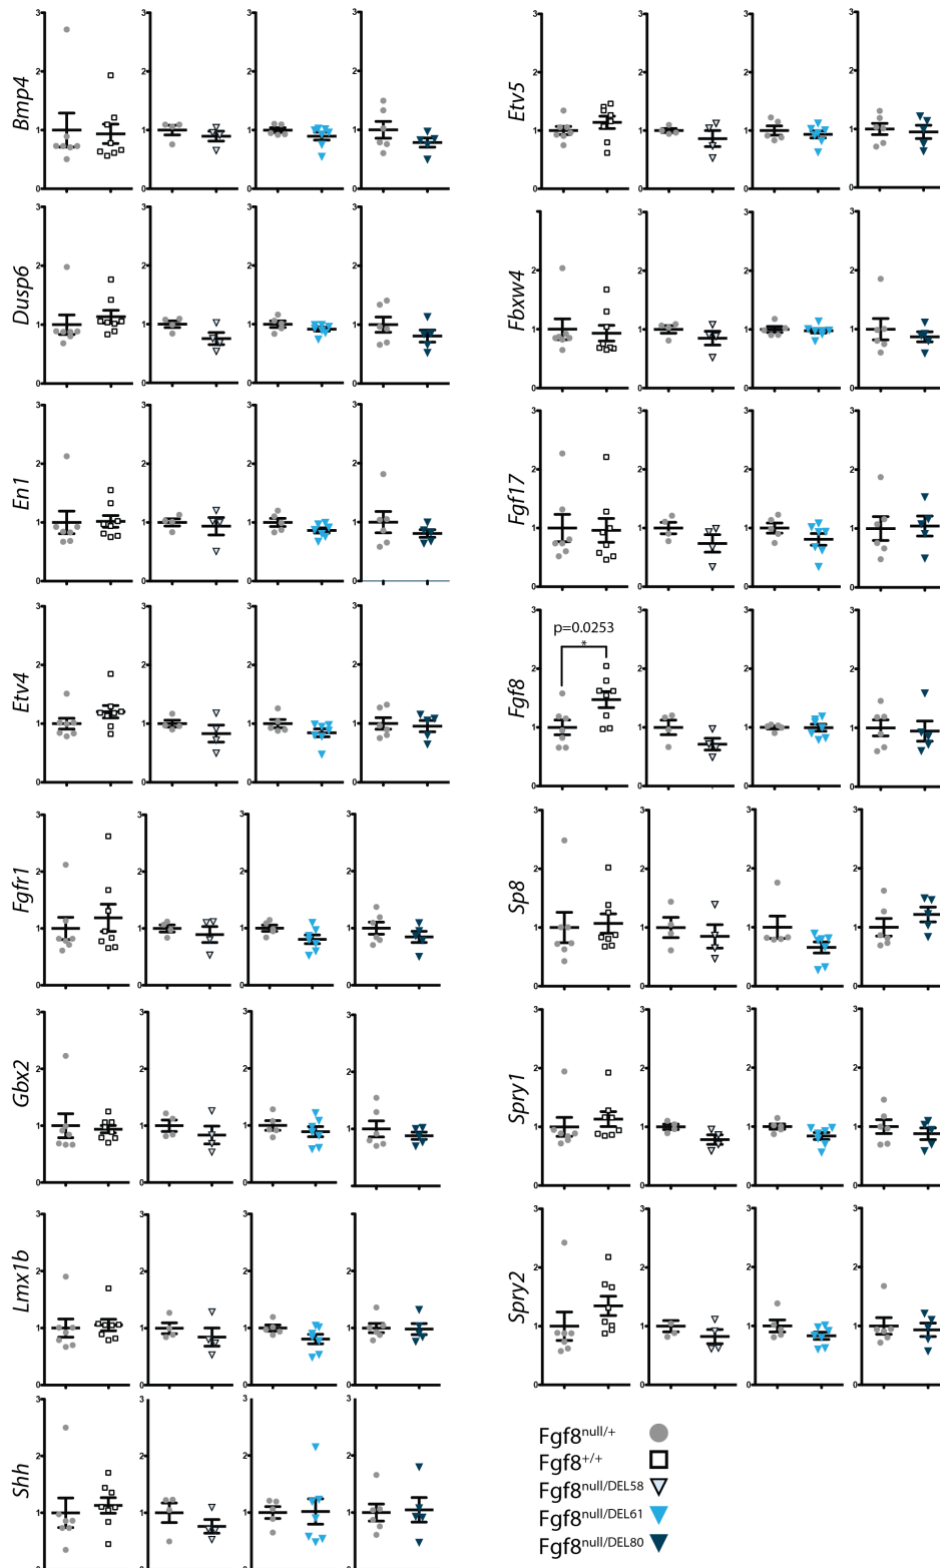

**Supplementary Figure 2. Gene expression levels are maintained in AER enhancer mutants.** RT-qPCR analysis of e10.5 forelimb in *Fgf8*<sup>null/+</sup>, WT (n=7), DEL58 (n=4), DEL61 (n=5) and DEL80 (n=5) embryos. Relative expression of indicated mRNA as compared to heterozygous *Fgf8*<sup>null/+</sup> littermate controls. Expression was normalized to average of *Hprt1* and *PGK1* mRNA. Individual data points as well as mean  $\pm$  SEM are indicated. \* $p < 0.05$  (two-tailed Student's *t*-test).

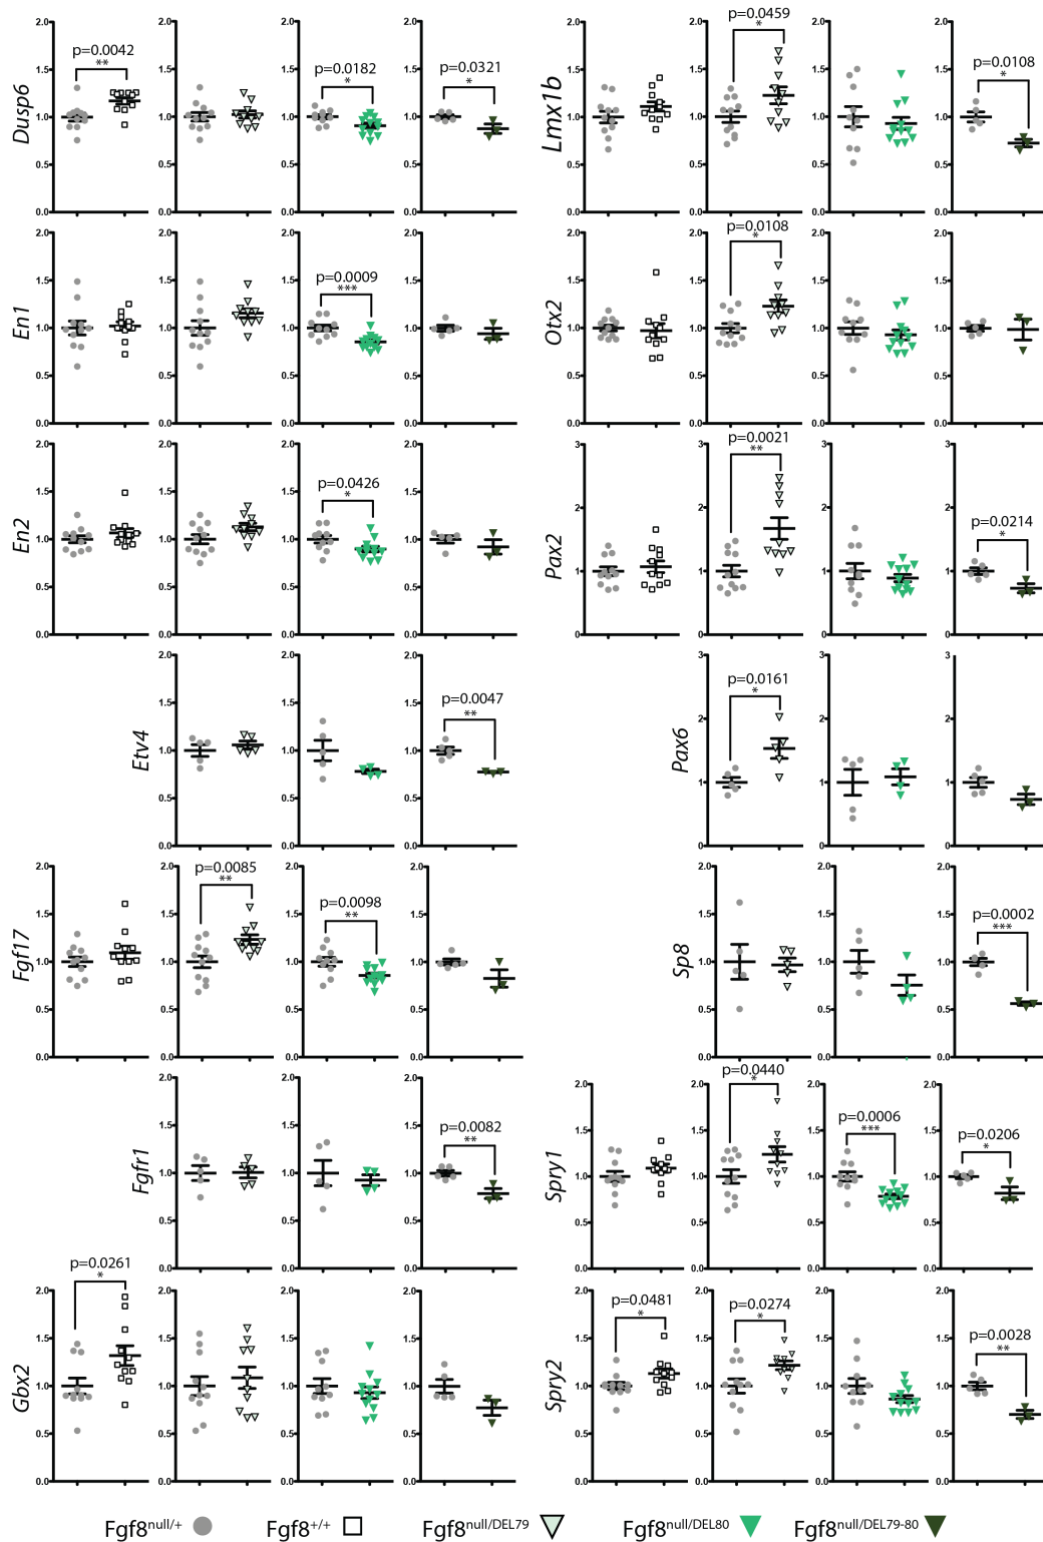

**Supplementary Figure 3. Minor changes in gene expression levels accompany DEL79, DEL80 and DEL79-80 mutants.** RT-qPCR analysis of e10.5 dissected MHB region in *Fgf8*<sup>null/+</sup> (n=11, 5/11, 5/10, 5), WT (n=11), DEL79 (n=5/10), DEL80 (n=4/12) and DEL79-80 (n=3) embryos. Relative expression of indicated mRNA as compared to heterozygous *Fgf8*<sup>null/+</sup> littermate controls. Expression was normalized to average of *Hprt1* and *PGK1* mRNA. Individual data points as well as mean  $\pm$  SEM are indicated. \*p<0.05, \*\*p<0.01, \*\*\*p<0.001 (two-tailed Student's *t*-test).

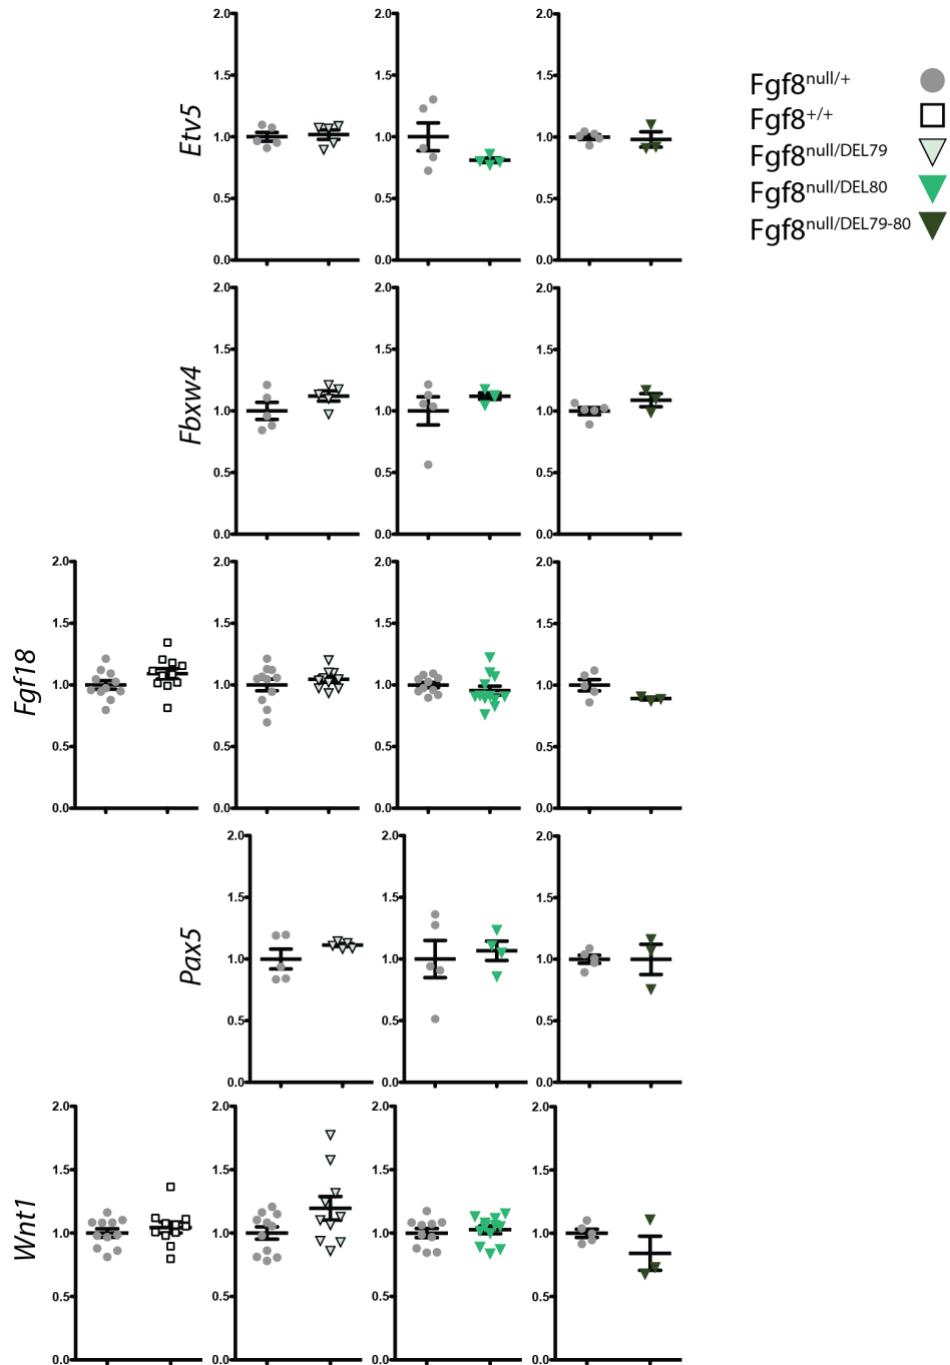

**Supplementary Figure 4. Genes with no significant expression changes in any of DEL79, DEL80 and DEL79-80 mutants.** RT-qPCR analysis of e10.5 dissected MHB region in *Fgf8*<sup>null/+</sup> (n=11, 5/11, 5/10, 5), WT (n=11), DEL79 (n=5/10), DEL80 (n=4/12) and DEL79-80 (n=3) embryos. Relative expression of indicated mRNA as compared to heterozygous *Fgf8*<sup>null/+</sup> littermate controls. Expression was normalized to average of *Hprt1* and *PGK1* mRNA. Individual data points as well as mean  $\pm$  SEM are indicated.

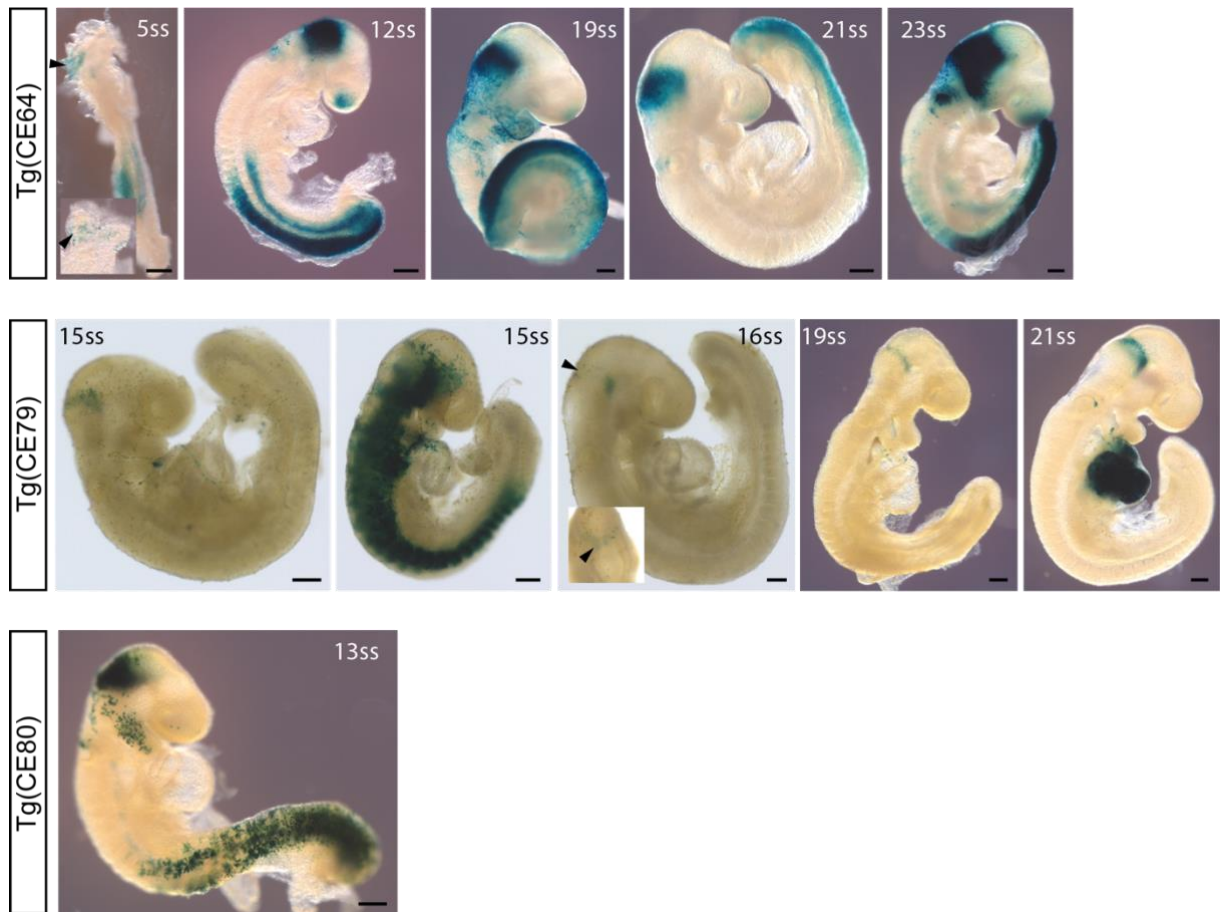

**Supplementary Figure 5. Transgenic enhancer activity of MHB enhancers.** Only CE64 drives reporter expression at earliest stages of MHB specification (2 out of 2 embryos, e8-8.5, 5 and 12 somites respectively). At e9.0-e9.5 (ss13-23) all enhancers display some activity in the MHB (CE64: 3 out of 6, CE79: 5 out of 6, CE80: 1 out of 3). Embryos lacking activity are not shown. Arrowhead indicate MHB region displayed in dorsal view in inset picture of Tg(CE64) and Tg(CE79) embryo. Scalebar is 200 $\mu$ m.

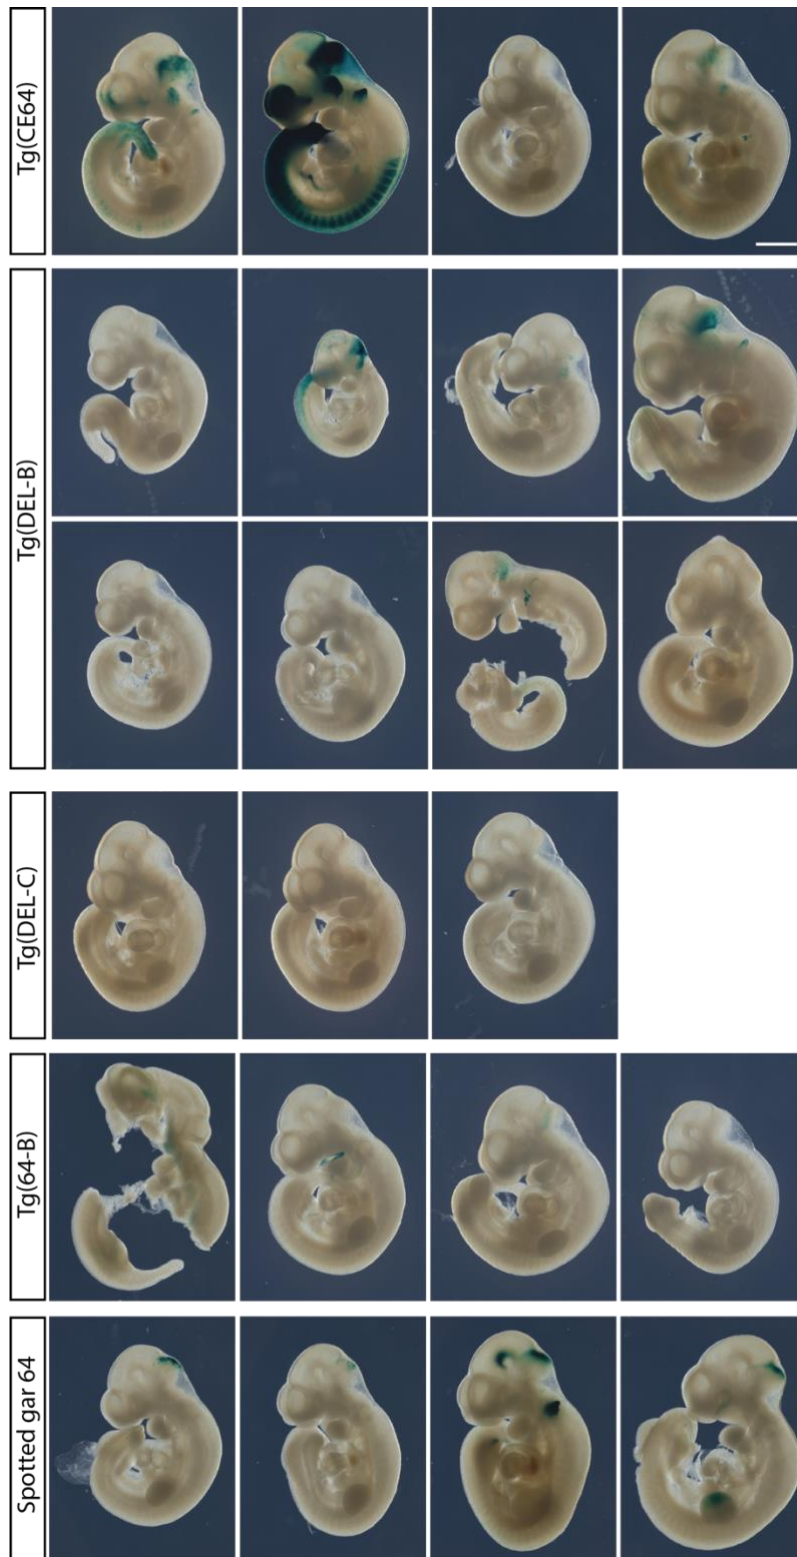

**Supplementary Figure 6. Transgenic enhancer activity of mouse CE64 and spotted gar CE64.** Compilation of all transgenic embryos harvested for Tg(CE64), Tg(DEL-B), Tg(DEL-C), Tg(64-B) and Tg(Spotted gar64B) . Expression is absent in the MHB of Tg(DEL-B), Tg(DEL-C) and Tg(64-B) embryos while all Tg(Spotted gar 64B) embryos display expression in the MHB region. Note also the hindbrain expression present in 4 of the Tg(DEL-B) embryos. Scalebar is 1mm.

**Block#1**

|             |                                  |
|-------------|----------------------------------|
| Human       | GGACAACAAGGAAAATCGGCTG-GCCCATTGT |
| Mouse       | GGACAACAAGGAAAATCGGCTG-GTCCATTGT |
| Pika        | GGACAACAAGGAAAATCGGCTG-GCCTATTGT |
| Pig         | GGACAACAAGGAAAATCGGCTG-GCCCATTGT |
| Dog         | GGACAACAAGGAAAATCGGCGG-GCCCATTGT |
| Megabat     | GGACAACAAGGAAAATCGGCTG-GCCCATTGT |
| Shrew       | GGACAACAAGGAAAATCGGCCA-GCCCATTGT |
| Elephant    | GGACAACAAGGAAAATCGGCTG-GCCCATTGT |
| Opossum     | GGACAACAAGGAAAATAGGCTG-GCCCATTGT |
| Chicken     | GAACAACAAGGAAAATATGCTG-GCCCATTGT |
| Lizard      | GAACAACAAGGAAAATATGCTGAGTCCATTGT |
| Xenopus     | AAACAACAAGGAAAATCTGCT--TTCTATTGT |
| Coelacanth  | AAGCAACAAGGAAAACCTGCT--ACCCATTGT |
| Zebrafish   | -----GCTCATTGC                   |
| Spotted_gar | -----                            |

**Block#2**

|             |                            |
|-------------|----------------------------|
| Human       | GTGCTAAGTGAGATGAAAGGGG     |
| Mouse       | GTGCTAAGTGAGATGAAAGGGG     |
| Pika        | GTGCTAAGTGAGATGAAAGGGG     |
| Pig         | GTGCTAAGTGAGATGAAAGGGG     |
| Dog         | GTGCTAAGTGAGATGAAAGGGA     |
| Megabat     | GGTGCTAAGTGAGATGAAAGGGG    |
| Shrew       | GTGCTAAGTGAGATGAAAGGGG     |
| Elephant    | GTGCTAAGTGAGATGAAAGGGG     |
| Opossum     | GTGCTAAGTGAGATGAAAGCAG     |
| Chicken     | GCACCAAGGGAGATGAAAGGGA     |
| Lizard      | ACACTATAGGAGATGAAAGGGA     |
| Xenopus     | GTACTAAGTGAGATGAAAGGGA     |
| Coelacanth  | GAGCAGGATTAATAAAAAAAAAAGGG |
| Zebrafish   | --GCT-----                 |
| Spotted_gar | -----                      |

**Block#3**

|             |                 |
|-------------|-----------------|
| Human       | CCCGCCTGCCAATCA |
| Mouse       | CCCGCCTGCCAATCA |
| Pika        | CCCGCCTGCCAATCA |
| Pig         | CCCGCCTGCCAATCA |
| Dog         | CCCGCCTGCCAATCA |
| Megabat     | CCCGCCTGCCAATCA |
| Shrew       | CCCGCCTGCCAATCA |
| Elephant    | CCCGCCTGCCAATCA |
| Opossum     | CCCGCCTGCCAATCA |
| Chicken     | ACCACCTGCCAATCA |
| Lizard      | GCTGCCTGCCAATCA |
| Xenopus     | ACAGCCTGCCAATCA |
| Coelacanth  | CCATCCTGTCAATCA |
| Zebrafish   | -----           |
| Spotted_gar | -CCACCTCCCAACCA |



**Block#4**

```
Human      AGTTATT-AAGGTCACAATGTTAAATTCTTTTGACCTGCACCTAATCAAAGAT
Mouse     AGTTATT-AAGGTCACAATGTTAAATTCTTTTGACCTGCACCTAATCAAAGAT
Pika      AGTTATT-AAGGTCACAATGTTAAATTCTTTTGACCTGCACCTAATCAAAGAT
Pig       AGTTATT-AAGGTCACAATGTTAAATTCTTTTGACCTGCACCTAATCAAAGAT
Dog       AGTTATT-AAGGTCACAATGTTAAATTCTTTTGACCTGCACCTAATCAAAGAT
Megabat   AGTTATT-AAGGTCACAATGTTAAATTCTTTTGACCTGCACCTAATCAAAGAT
Shrew     AGTTATT-AAGGTCACCATGTTAAATTCTTTTGACCTGCACCTAATCAAAGAT
Elephant  AGTTATT-AAGGTCACAATGTTAAATTCTTTTGACCTGCACCTAATCAAAGAT
Opossum   AGTTATT-AAGGTCACAATGTTAAATTCTTTTGACCTGCACCTAATCAAAGAT
Chicken   AGTTATT-AAGGTCACGATGTGAAATTCTTTTGACCTACACCTAATCAAAGAT
Lizard    ACTTATT-AAGGTCACAATGT-AGACAATATTAACCTGAATCCAATCAAAGAT
Xenopus   AGTAAGCAAAGGTCACAATGTTACATTCTTTTGACCTGCACTTA-----
Coelacanth AGGTATC-AA-----
Zebrafish -----
Spotted_gar -----
```

**Supplementary Figure 7. MUSCLE alignments of conserved blocks in 64-C.** Disruption of both block #2 and #3 together through CRISPR/Cas9 editing cause absence of MHB-derived structures while deletion of any single block does not cause phenotype.



**Supplementary Table 1.** Genomic coordinates of the CRISPR deletions for all founders used in this study.

| <b>Strain name</b> | <b>Target CE</b> | <b>Genomic coordinates of deletions MM10</b> | <b>Size of deletion (bp)</b> |
|--------------------|------------------|----------------------------------------------|------------------------------|
| 58-432             | CE58             | 45,581,399 - 45,582,371                      | 973                          |
| 59-708             | CE59             | 45,585,002 - 45,585,325                      | 324                          |
| 61-711             | CE61             | 45,592,927 - 45,594,008                      | 1082                         |
| 61-713             | CE61             | 45,592,924 - 45,594,025                      | 1102                         |
| 64-572             | CE64             | 45,615,282 - 45,617,095                      | 1811                         |
| 64-579             | CE64             | 45,615,283 - 45,617,093                      | 1814                         |
| 66-541             | CE66             | 45,622,255 - 45,622,840                      | 586                          |
| 79-529             | CE79             | 45,717,702 - 45,718,193                      | 492                          |
| 79-681             | CE79             | 45,717,759 - 45,718,349                      | 591                          |
| 79-281             | CE79             | 45,717,706 - 45,718,198                      | 493                          |
| 80-622             | CE80             | 45,734,600 - 45,735,569                      | 970                          |
| 80-615             | CE80             | 45,734,594 - 45,735,569                      | 976                          |

**Supplementary Table 2.** Genomic coordinates, type of modification and phenotypic outcome for all embryonic CRISPR deletions reported in this study.

| Name    | Coordinates MM10                                   | Size                              | Intact MHB | Type of modification  |
|---------|----------------------------------------------------|-----------------------------------|------------|-----------------------|
| DEL-AC1 | 45,615,244 - 45,617,008                            | 1765                              | X          | Deletion              |
| DEL-A1  | 45,615,265 - 45,616,287                            | 1023                              | ✓          | Deletion              |
| DEL-AB1 | 45,615,282 - 45,616,929                            | 1648                              | X          | Deletion              |
| DEL-AB3 | 45,615,282 - 45,616,932                            | 1651                              | X          | Deletion              |
| DEL64   | 45,615,283 - 45,617,093                            | 1814                              | X          | Deletion              |
| DEL-AB2 | 45,615,790 - 45,616,928                            | 1139                              | X          | Deletion              |
| DEL-B1  | 45,616,275 - 45,616,928                            | 654                               | X          | Deletion              |
| DEL-B8  | 45,616,221 - 45,616,929<br>45,617,090- 45,617,107  | 709<br>18                         | X          | Deletion              |
| DEL-B2  | 45,616,273 - 45,616,516                            | 244                               | ✓          | Deletion              |
| DEL-B4  | 45,616,517 - 45,616,722                            | 206                               | ✓          | Deletion              |
| DEL-B3  | 45,616,517 - 45,616,928                            | 412                               | ✓          | Deletion              |
| DEL-BC1 | 45,616,542 - 45,617,093                            | 552                               | X          | Deletion              |
| DEL-BC2 | 45,616,672 - 45,617,098<br>45,616,100 - 45,617,257 | 427<br>159                        | X          | Deletion<br>Inversion |
| DEL-B7  | 45,616,720 - 45,616,930                            | 211                               | ✓          | Deletion              |
| DEL-BC4 | 45,616,721 - 45,618,022                            | 1302                              | X          | Deletion              |
| DEL-B6  | 45,616,722 - 45,616,936                            | 215                               | ✓          | Deletion              |
| DEL-B5  | 45,616,726 - 45,616,929                            | 204                               | ✓          | Deletion              |
| DEL-BC5 | 45,616,768 - 45,617,102                            | 335                               | X          | Deletion              |
| DEL-C1  | 45,616,922 - 45,617,092                            | 171                               | X          | Deletion              |
| DEL-C6  | 45,616,923 - 45,616,929                            | 7                                 | ✓          | Deletion              |
| DEL-C7  | 45,616,926 - 45,617,534                            | 609                               | X          | Deletion              |
| DEL-C8  | 45,616,926 - 45,617,534                            | 609                               | X          | Deletion              |
| DEL-C9  | 45,616,927 - 45,617,023                            | 97                                | X          | Deletion              |
| DEL-C11 | 45,616,930 - 45,616,938<br>45,616,956 - 45,617,056 | 304 insertion + 9 deletion<br>101 | X          | Indel<br>Deletion     |
| DEL-C2  | 45,616,930 - 45,616,995                            | 66                                | ✓          | Deletion              |
| DEL-C10 | 45,616,930 - 45,617,055                            | 126                               | X          | Deletion              |
| DEL-C12 | 45,616,930 - 45,617,091                            | 162                               | X          | Deletion              |
| DEL-C13 | 45,616,930 - 45,617,094                            | 165                               | X          | Deletion              |
| DEL-C15 | 45,616,935 - 45,617,257                            | 323                               | X          | Deletion              |
| DEL-C16 | 45,616,967 - 45,616,971                            | 5                                 | ✓          | Deletion              |
| DEL-C17 | 45,616,968 - 45,617,005                            | 38                                | X          | Deletion              |
| DEL-C5  | 45,616,971 - 45,617,007                            | 37                                | X          | Deletion              |
| DEL-C3  | 45,616,991 - 45,617,056                            | 66                                | ✓          | Deletion              |
| DEL-C18 | 45,616,999 - 45,617,055                            | 57                                | ✓          | Deletion              |
| DEL-C4  | 45,617,045 - 45,617,146                            | 102                               | ✓          | Deletion              |
| DEL-C20 | 45,617,051 - 45,617,056<br>45,617,088 - 45,617,112 | 6<br>25                           | ✓          | Deletion<br>Deletion  |
| DEL-C19 | 45,617,051 - 45,617,056<br>45,617,090 - 45,617,108 | 6<br>19                           | ✓          | Deletion<br>Deletion  |
| DEL-C21 | 45,617,056 - 45,617,081                            | 26                                | ✓          | Deletion              |
| DEL-C22 | 45,617,056 - 45,617,094                            | 39                                | ✓          | Deletion              |

**Supplementary Table 3.** Primers used for genotyping.

| <b>Primer name</b>     | <b>Sequence</b>         |
|------------------------|-------------------------|
| CE58R-CRISP1F-Surveyor | ACAACCAGGCTGTCTTCCAG    |
| CE58R-CRISP1R-Surveyor | CTCCACCCTACCCCAAGTCT    |
| CE58R-CRISP2F-Surveyor | TGTAGTGCTGTGGTGCTGAG    |
| CE58R-CRISP2R-Surveyor | AGACTCAGGAGGCTAGGGTG    |
| CE59-CRISP1F-Surveyor  | AGAGCACACGTGTTTCAGACA   |
| CE59-CRISP1R-Surveyor  | GGACTGCCCTCTTGAAAGT     |
| CE59R-CRISP2F-Surveyor | TCAGTTTGGTGTCAGCAGGC    |
| CE59R-CRISP2R-Surveyor | GAACGTGGCTTCAGCTTGTG    |
| CE61-CRISP1F-Surveyor  | CTGTGGGAAGGATCGGTCTG    |
| CE61-CRISP1R-Surveyor  | TTTGGAGATGACAGGTGGGC    |
| CE61-CRISP2F-Surveyor  | ACCATCTGCCACCGAGAATG    |
| CE61-CRISP2R-Surveyor  | GAAGAAGGCAGGCACAAAGC    |
| CE64-CRISP1F-Surveyor  | AGAGTGACTIONGGCATCAGTGC |
| CE64-CRISP1R-Surveyor  | GTAGAGGGAAGCATTGGGGG    |
| CE64-CRISP2F-Surveyor  | CCTGGGAAAATGCAGGCAC     |
| CE64-CRISP2R-Surveyor  | GAGACCCAGTCCTGACCTCT    |
| CE64-CRISP3F-Surveyor  | TTTGGACACACTGACAGGGG    |
| CE64-CRISP3R-Surveyor  | GAGGAGGGCGGAATGAAGAG    |
| CE66-CRISP1F-Surveyor  | CCAAGGGAACCAAGTGTGGA    |
| CE66-CRISP1R-Surveyor  | AGGGGAAAGGGGAGCCATAA    |
| CE66-CRISP2F-Surveyor  | TTATGGCTCCCCTTTCCCCT    |
| CE66-CRISP_R2-Surveyor | AGAGGACACAAACAGACGGG    |
| CE79-CRISP1F-Surveyor  | CACCAGTCCATGCAGACCAT    |
| CE79-CRISP1R-Surveyor  | TCACACACCATACCCCCTGA    |
| CE79-CRISP2F-Surveyor  | AATCTCCCTGAGAGTGGCCT    |
| CE79-CRISP2R-Surveyor  | ACCTCATTTCCCTGAGGGGT    |
| CE80-CRISP1F-Surveyor  | TAAGCATATTGGGCCGGCAA    |
| CE80-CRISP1R-Surveyor  | AGGTGAGCAGAAGAGAGGGT    |
| CE80-CRISP2F-Surveyor  | CCCAGCTCCTCGCACATAA     |
| CE80-CRISP2R-Surveyor  | TTTTGGCACCTCTCTTGGCA    |
| CE80-CRISP_F2-Surveyor | CCAAGACCTGTGTTGGGTCT    |
| CE80-CRISP_R2-Surveyor | GAAGAGCAATTGCCAGTGT     |
| CE64-F1                | GACCTACACAGGCCGCATTA    |
| CE64-R1                | AAGAGACAATGGACCAGCCG    |
| CE64-F2                | TCTAGCAATTTGGAGGCGGG    |
| CE64-R2                | AAGATTTGGCATGGGAGCCA    |
| 64-F3                  | CCTCGGCACGCCATCTATAC    |
| CE64-R3                | AGATACATCGCAAGGCAGCA    |
| Tcf/Lef1 DEL           | TGCTAAGTGAGATGAAAGGGGCC |

**Supplementary Table 4.** CRISPR gRNAs used for zygote injections.

| <b>gRNA Name</b> | <b>CE Target</b> | <b>Sequence</b>          |
|------------------|------------------|--------------------------|
| CE58-CRISP1      | 58               | CCAAGCACCTTGGCCGTGGGAGG  |
| CE58-CRISP2      | 58               | GGGCGGCGTGCGCAGAGCCTTGG  |
| CE59-CRISP1      | 59               | TAACAAGGCGACATAATTACAGG  |
| CE59-CRISP2      | 59               | CTCTCCCCCGCCCCGTACAGGGG  |
| CE61-CRISP1      | 61               | GTACCCACCACGTCAGCGGGAGG  |
| CE61-CRISP2      | 61               | CGGCAACAAGCCCGATCCATGGG  |
| CE64-CRISP1      | 64               | TCAGAAGCTTTACCGCCTAGAGG  |
| CE64-CRISP2      | 64               | TGCCACCTGGTACTTCCCGCAGG  |
| CE64-CRISP3      | 64               | CCTTTCAAATCCGAATGGGGAGG  |
| CE64-CRISP4      | 64               | GTATGATTTACGTCAGAACAGG   |
| CE64-CRISP5      | 64               | GAGGGAGAAGCAACCCCGATGGG  |
| CE64-CRISP6      | 64               | GGACAACAAGGAAAATCGGCTGG  |
| CE64-CRISP7      | 64               | CGGTAAAGCTTCTGAGAATCTGG  |
| CE64-CRISP8      | 64               | CTCAGCTCTAACTGGGCCTCAGG  |
| CE64-CRISP9      | 64               | GTGCATCTTTGATTAGGTGCAGG  |
| CE64-CRISP10     | 64               | GTGATTGGCAGGCGGGCTATGGG  |
| CE64-CRISP11     | 64               | GTGCATCTTTGATTAGGTGCAGG  |
| CE64-CRISP12     | 64               | TGTGCTAAGTGAGATGAAAGGGG  |
| CE64-CRISP13     | 64               | TTAGCACAGAGAAGAGACAATGG  |
| CE64-CRISP14     | 64               | ACTAGAGGTGATTGGCAGGCGGG  |
| CE64-CRISP15     | 64               | AATAACTAGAGGTGATTGGCAGG  |
| CE64-CRISP16     | 64               | CCAATCACCTCTAGTTATTAAGG  |
| CE66-CRISP3      | 66               | AACAACCTCCCTTTGAACCTCCGG |
| CE66-CRISP6      | 66               | TACAGGGGCAGTGTAGTAATCCG  |
| CE79-CRISP1      | 79               | TGCAGAGCAGCCCGGTAGCTGGG  |
| CE79-CRISP2      | 79               | TATCACGGCCCGGAGCTCAGAGG  |
| CE80-CRISP2      | 80               | CTTCAGGTGCGGGGACACGGGGG  |
| CE80-CRISP6      | 80               | AAGGCAGACCACTCTATCCCTGG  |

**Supplementary Table 5.** Cloning primers used for transgenic constructs.

| <b>Primer name</b> | <b>Sequence</b>                   | <b>Target construct</b>        |
|--------------------|-----------------------------------|--------------------------------|
| 64-1/3 F           | TGaagcttCTAGAGGCAGAGCAGCTCAG      | Tg(CE64), Tg(DEL-C), Tg(DEL-B) |
| 64-1/3 R           | TGctcgagCCCCATTCGGATTTGAAAGGGCCGG | Tg(CE64), Tg(DEL-B)            |
| 64-6/3DEL R        | TGctcgagCCCCAGATTTTCCTTGTTGTCC    | Tg(DEL-C)                      |
| 64-2/5 F           | TGaagcttTCCCTCAGCGATTGCACAG       | Tg(64-B)                       |
| 64-2/5 R           | TGctcgagGATTTTCCTTGTTGTCCCTTGTTTG | Tg(64-B)                       |
| 64-LepOcu F        | TGaagcttATGGATGTGGTTGGGAGGTG      | Spotted gar 64                 |
| 64-LepOcu R        | TGctcgagGTCTCGCTGTACGCTTATACAAAG  | Spotted gar 64                 |

**Supplementary Table 6.** RT-qPCR primers used for gene expression analysis and their corresponding targets.

| Primer name                | Sequence                  | Target gene |
|----------------------------|---------------------------|-------------|
| #2579_Mm_RT_Dusp6_MKP3_Fwd | GAATGAGAACACTGGTGGAGAGTCG | Dusp6       |
| #2580_Mm_RT_Dusp6_MKP3_Rev | ACTCGGCCTGGAACCTACTGAAGC  |             |
| #2569_Mm_RT_En1_Fwd        | TGGGTCTACTGCACACGCTATTCG  | En1         |
| #2570_Mm_RT_En1_Rev        | GCCGCTTGTCTTCCTTCTCGTTC   |             |
| #2555_Mm_RT_En2_Fwd        | GCTATTCTGACCGGCCTTCTTCAG  | En2         |
| #2556_Mm_RT_En2_Rev        | GGTACCTGTTGGTCTGAAACTCAGC |             |
| #2567_Mm_RT_Etv4_PEA3_Fwd  | AGGAAGCCACCACTCCCCTACCAC  | Etv4        |
| #2568_Mm_RT_Etv4_PEA3_Rev  | GGGACTTGATGGCGATTTGTCTG   |             |
| RTqPCR_Etv5_Fwd            | TGAGCAGTTTGTCCCAGATTTTCAG | Etv5        |
| RTqPCR_Etv5_Rev            | CTGTGCAGCTCCCGTTTGATCTTG  |             |
| #2529_Mm_RT_Fbxw4_Fwd      | CCCACAACAAGCTGTTCCAGTCAC  | Fbxw4       |
| #2530_Mm_RT_Fbxw4_Rev      | TACACACCATCCAGACCGAAGACC  |             |
| #2599_Mm_RT_FGF17_Fwd      | AAGAGGGGCAAGCTGATTGGGAAG  | Fgf17       |
| #2600_Mm_RT_FGF17_Rev      | AAAGCCATGAACCAGCCCTCGTG   |             |
| #2601_Mm_RT_FGF18_Fwd      | GGCGAGGACGGGGACAAGTATG    | Fgf18       |
| #2602_Mm_RT_FGF18_Rev      | CCGGACTTGACTCCCGAAGGTATC  |             |
| #2531_Mm_RT_Fgf8_Fwd       | TATCGGTCTCCACAATGAGCTTCG  | Fgf8        |
| #2532_Mm_RT_Fgf8_Rev       | CCTGGCCAACAAGCGCATCAAC    |             |
| Fwd_SYBR_FgFR1             | TCTGGCCTCTACGCTTGC        | Fgfr1       |
| Rev_SYBR_FgFR1             | AGGATGGGAGTGCATCTGA       |             |
| #2561_Mm_RT_Gbx2_Fwd       | GCTCGCTGCTCGCTTTCTCTGC    | Gbx2        |
| #2562_Mm_RT_Gbx2_Rev       | GCTGTAATCCACATCGCTCTCCAG  |             |
| #2568_Mm_RT_Etv4_PEA3_Rev  | GGGACTTGATGGCGATTTGTCTG   | Bmp4        |
| #2569_Mm_RT_En1_Fwd        | TGGGTCTACTGCACACGCTATTCG  |             |
| Hprt_mRNA_F                | CTTCCTCCTCAGACCGCTTTT     | Hprt        |
| Hprt_mRNA_R                | CATCATCGCTAATCACGACGC     |             |
| #2571_Mm_RT_Lmx1b_Fwd      | AGATGAAGAAGCTGGCCCCGAGAC  | Lmx1b       |
| #2572_Mm_RT_Lmx1b_Rev      | CTCCATGCGGCTTGACAGAACCTC  |             |
| #2557_Mm_RT_Otx2_Fwd       | CTGCATCCCTCCGTGGGCTACC    | Otx2        |
| #2558_Mm_RT_Otx2_Rev       | CGTCGAGCTGTGCCCTAGTAAATG  |             |
| #2507_Mm_RT_Pax2_Fwd       | CGAGGGCATCTGCGATAATGAC    | Pax2        |
| #2508_Mm_RT_Pax2_Rev       | CTGCTGAACTTTGGTCCGGATG    |             |
| Fwd_SYBR_Pax5              | ACGCTGACAGGGATGGTG        | Pax5        |
| Rev_SYBR_Pax5              | GGGGAACCTCCAAGAATCAT      |             |
| mPax6-qpcr-fwd             | CAAACACACATGAACAGTCAGC    | Pax6        |
| mPax6-qpcr-rev             | ACTTGACGGGAACTGACAC       |             |
| Fwd_SYBR_MmPGK1            | TACCTGCTGGCTGGATGG        | PGK1        |
| Rev_SYBR_MmPGK1            | CACAGCCTCGGCATATTTCT      |             |
| #2565_Mm_RT_Sp8_Fwd        | TCGACGATTTCGAAGGGGAACG    | Sp8         |
| #2566_Mm_RT_Sp8_Rev        | TGGGGCTGCCGATCTTATTACAGG  |             |
| #2551_Mm_RT_Spry1_Fwd      | GGTCATAGGTCAGATCGGGTCATCC | Spry1       |



|                       |                            |       |
|-----------------------|----------------------------|-------|
| #2552_Mm_RT_Spry1_Rev | TGGGTGGGGTCCTCTTTCAAGG     |       |
| #2549_Mm_RT_Spry2_Fwd | AAGGGAGAGGGGTTGGTGCAAAG    | Spry2 |
| #2550_Mm_RT_Spry2_Rev | CCATCAGGTCTTGGCAGTGTGTTC   |       |
| #2577_Mm_RT_Shh_Fwd   | CCCCAATTACAACCCCGACATC     | Shh   |
| #2578_Mm_RT_Shh_Rev   | GGCATTAACTTGTCTTTGCACCTCTG |       |
| #2559_Mm_RT_Wnt1_Fwd  | CCAACAGTAGTGGCCGATGGTG     | Wnt1  |
| #2560_Mm_RT_Wnt1_Rev  | CAGACTCTTGAATCCGTCAACAGG   |       |
