# Supplementary material for: Dissection of the Fgf8 regulatory landscape by in vivo CRISPR-editing reveals extensive intra- and inter-enhancer redundancy
Source: PubMed Central journal article supplement (PMC7815712; doi:10.1038/s41467-020-20714-y), 2021-01-19
Supplement: 41467_2020_20714_MOESM3_ESM.pdf [file 41467_2020_20714_MOESM3_ESM.pdf]

## **Description of Additional Supplementary Files**

**Supplementary Movie 1. DEL64 mutants display severe hypoplasia of the midbrain and cerebellum.**

Tomographic sections from e18.5 mutant brain generated by optical projection tomography. Note the absence of all the MHB-derived structures: the superior colliculus, inferior colliculus, isthmus, and cerebellum.

**Supplementary Movie 2. DEL79 mutants display normal brain anatomy.**

Tomographic sections from e18.5 mutant brain generated by optical projection tomography. Note the normal appearance of all MHB derived structures: the superior colliculus, inferior colliculus, isthmus, and cerebellum.

**Supplementary Movie 3 DEL80 mutants display normal brain anatomy.**

Tomographic sections from e18.5 mutant brain generated by optical projection tomography. Note the normal appearance of all MHB derived structures: the superior colliculus, inferior colliculus, isthmus, and cerebellum.

**Supplementary Movie 4. DEL79-80 mutants display normal brain anatomy.**

Tomographic sections from e18.5 mutant brain generated by optical projection tomography. Note the normal appearance of all MHB derived structures: the superior colliculus, inferior colliculus, isthmus, and cerebellum.
